# Supplementary material
Source: publisher figshare collection journal article supplement (https://gsajournals.figshare.com/ndownloader/files/14217743)
Supplement: Supplementary file 1 [file 14217743]

## Sheet: graingenes_ssrs_map_data_recent
Table S2: SSR markers projected onto the Ae. tauschii genome reference sequence Aet v4.0
Projected marker			Validating marker
SSR ID	Aet pseudomolecule	Location (bp)	SSR ID	Aet pseudomolecule	Location (bp)
AC14	3	593029038
AC24	3	430095229
AC4	4	26125176
AG22	3	261956578
AG22	6	260149404
AWBMS80	1	336682182
BARC1	5	248762548	CFD40	5	275321936
BARC1008	2	196399927
BARC1008	4	402527181
BARC1008	5	537906551
BARC1008	6	300305509
BARC101	3	512367598	WMC418	3	473904622
BARC1014	7	531928495
BARC1017	2	636057034
BARC1017	3	284229525
BARC1017	6	169494789
BARC1018	5	576005396
BARC1027	3	241831038	BARC1103	3	248609514
BARC1028	1	17188206
BARC1028	3	17383909
BARC1028	5	551591462
BARC1028	6	1411788
BARC1030	6	367546807
BARC1034	7	177751524
BARC1038	2	374186916
BARC1039	1	469179905
BARC1040	3	486751239
BARC1042	2	492414945
BARC1046	3	599314047
BARC104c	6	493976134
BARC105	4	38839695	GPW94042	4	32077057
BARC1050	4	367575342
BARC1052	4	48451004
BARC1054	1	216689205
BARC1059	5	354621633
BARC106	4	283581388	CFD71	4	332090884
BARC1060	1	444851131
BARC1060	4	377944516
BARC1064	2	91694764
BARC1077	6	370401942
BARC108	7	269189410	WMC182	3	278890673
BARC1084	7	579421946	BARC121	7	532772325
BARC1090	1	7142429
BARC1097	5	294493384	CFD40	5	275321936
BARC1098	6	121052816
BARC11	2	466379985	gwm539	2	511843939
BARC110	5	541120610	BARC345	5	522499028
BARC1103	3	248609514	BARC1027	3	241831038
BARC1103	5	531750112	BARC234	5	526548633
BARC1103	6	51195399
BARC1108	3	30781306
BARC1108	6	218701722
BARC111	7	593406563	BARC235	7	608350650
BARC1118	4	8180369	BARC352	7	39411727
BARC1119	3	285102139	CFD4	3	297280857
BARC1121	6	461768475	CFD45	6	481945112
BARC1123	2	44285512
BARC1138	2	604173114	BARC1138	2	604173114
BARC1139	3	609100784
BARC1139	5	228920217
BARC114	4	512273538
BARC1143	2	487480750
BARC1147	2	630798213	gwm526	2	629070357
BARC1148	4	82710854	WMC48	4	70644550
BARC115	3	548485934	BARC1103	5	531750112
BARC1155	2	405392818
BARC116	5	445374251	BARC55	2	475745598
BARC116	5	445374251	BARC55	5	459002858
BARC1161	3	440874994	GDM99	5	446697556
BARC1164	1	224035522
BARC1165	6	347525002
BARC1182	5	106229147	gwm293	5	102263741
BARC1183	4	524598639
BARC119	1	36518289	gwm106	1	20244905
BARC120	1	128563906	gwm11	1	133810048
BARC121	7	532772325	BARC172	7	511394913
BARC123	6	139033120	gwm325	6	104424731
BARC124	2	4442173	gwm210	2	5897248
BARC125	2	149464091
BARC125	3	177665351	CFD193	2	135435393
BARC125	3	177665351	CFD193	4	219068245
BARC126	7	91486135	WMS295	7	52139670
BARC128	1	197864334
BARC128	7	237190492	PSP3113	7	228495019
BARC130	5	4846692	WMC233	5	5507588
BARC132	3	41687747
BARC133	3	6387539	BARC147	3	6768470
BARC135	3	27232723	gwm71	3	2312594
BARC137	1	127811746	gwm11	1	133810048
BARC140	5	496319910	gwm271	5	462769675
BARC142	5	501131377	CFA2185	5	514100562
BARC143	3	568333698	BARC115	3	548485934
BARC143	5	305604698	BARC1097	5	294493384
BARC144	5	567323809	gwm269	5	569181525
BARC145	2	283837853	gwm358	2	240945343
BARC146	6	153709664	CFD190	6	114242441
BARC147	3	6768470	CFD79	3	13053973
BARC150	1	22634203
BARC152	2	422128370
BARC153	4	99069154
BARC154	7	61463983	WMS130	7	15770209
BARC157	3	544802430
BARC158	1	501475797	BARC287	1	501475865
BARC159	2	642835886	WMC167	2	630792014
BARC160	2	304364422	CFA2278	2	339368933
BARC161	5	204844439
BARC162	1	418792886	BARC28	5	413965391
BARC164	3	454950735	WMC418	3	473904622
BARC168	2	45709562	gwm484	2	49117097
BARC169	1	333954212	WMC216	1	369876670
BARC169	6	386902259
BARC172	7	511394913	GDM99	7	552523617
BARC173	6	12418485	CFD49	6	1591050
BARC175	6	435802116	CFD76	6	385814797
BARC176	7	299445123	WMC476	7	335231691
BARC177	5	559480186	CFD283	5	525356375
BARC179	3	146025257	BARC45	3	144011410
BARC18	2	246807769	BARC98	2	242111312
BARC18	2	246807769	BARC98	4	263838894
BARC181	1	173009791	WMC31	1	156289892
BARC184	7	12751373	CFD41	7	27253598
BARC19	3	232180343	WMC79	6	194794508
BARC193	4	16415016
BARC196	6	83972978	CFD33	6	59392954
BARC197	1	9637725	gwm33	1	8881496
BARC199	4	119089371	wsnp_RFL_Contig4151_4728831	4	121563636
BARC20	4	54423880	WMC48	4	70644550
BARC200	2	30748794	WMC210	2	5897248
BARC202	6	453728770	BARC23	6	440221691
BARC204	6	453497861	BARC23	6	440221691
BARC205	5	255918962	gwm358	2	240945343
BARC206	6	64401764
BARC209	5	70303863
BARC21	6	487177988	WMC773	6	483911209
BARC213	1	484007766	DUPW38	1	452378533
BARC217	4	65943484	WMC48	4	70644550
BARC218	3	29588876	CFD79	3	13053973
BARC219	7	64531817	WMC479	7	21065081
BARC223	4	500659204
BARC224	4	485076736
BARC225	4	38839006	BARC217	4	65943484
BARC227	4	460699025	gwm251	4	461640000
BARC228	2	76698043	gwm515	2	121023974
BARC229	1	60532841	WMC222	1	18628436
BARC23	6	440221691	BARC204	6	453497861
BARC231	2	400696690
BARC232	5	509419527	WMC160	5	508328029
BARC233	4	47292945
BARC234	5	526548633	BARC1103	5	531750112
BARC235	7	608350650	BARC111	7	593406563
BARC239	3	284229478
BARC239	5	70303864
BARC24	6	457956101	WMS626	6	444020458
BARC240	1	294231998	gwm498	1	264463288
BARC246	7	39189631
BARC249	3	578902074
BARC25	3	440241005	WMC527	3	421927999
BARC258	7	607597832
BARC26	7	385346730	PSP3035	3	342412542
BARC260	2	72191914
BARC263	1	8600671	gwm33	1	8881496
BARC265	2	12933608
BARC266	4	498383994
BARC268	3	432566452
BARC269	1	385454310	BARC83	1	387101640
BARC273	6	403583857	CFD76	6	385814797
BARC28	1	321942166	gwm357	1	362902343
BARC28	3	615520979	gwm162	3	619045611
BARC28	5	413965391	BARC4	5	429241173
BARC284	3	622964090
BARC286	5	429241294	gwm583	5	416292307
BARC287	1	501475865	BARC158	1	501475797
BARC288	4	124540194	WMC720	4	77655974
BARC295	3	37993	BARC147	3	6768470
BARC300	4	463229374
BARC301	6	11154593	BARC173	6	12418485
BARC302	1	346005071	gwm582	6	394993856
BARC310	3	2374555	WMC11	3	5717554
BARC314	3	588054638
BARC316	5	401054656	WMC173	3	445693965
BARC32	7	556164988	WMC613	7	582802596
BARC320	5	459834032	gwm639	5	425007359
BARC322	5	508051357	CFD29	5	491219793
BARC323	3	601119053	gwm3	3	590826241
BARC328	2	362830236
BARC330	5	419939384	gwm639	5	425007359
BARC332	6	16194601	CFD75	6	13632135
BARC334	4	285160919	BARC98	2	242111312
BARC334	4	285160919	BARC98	4	263838894
BARC337	4	76883906	WMC89	4	70644544
BARC342	3	49738647
BARC345	5	522499028	CFD29	5	491219793
BARC350	1	331195807
BARC350	3	446037063
BARC351	1	7052039
BARC351	3	408650177
BARC352	7	39411727	BARC92	7	51480092
BARC353	2	343290288	gwm473	2	306300055
BARC356	3	157026887	BARC359	4	123950960
BARC358	5	510559918	BARC101	3	512367598
BARC359	4	123950960	BARC288	4	124540194
BARC361	2	195662927
BARC363	3	611380666
BARC365	1	27659962
BARC365	6	112641966
BARC4	5	429241173	gwm540	4	405679187
BARC42	3	507843080	gwm645	3	505927340
BARC44	5	352712695	BARC143	5	305604698
BARC45	3	144011410	BARC179	3	146025257
BARC48	4	511880173	CFD54	4	511151369
BARC49	5	466699231	GDM153	5	447419299
BARC50	7	640014075	WMS344	7	636074003
BARC53	7	617192943	BARC76	7	632665106
BARC55	1	46945077	GDM33	1	653884
BARC55	2	475745598	WMC261	3	428568682
BARC55	5	459002858	BARC116	5	445374251
BARC59	5	543433243	WMC640	5	541027254
BARC62	1	500341922	gwm232	1	485503825
BARC65	7	520643062	WMS573	7	540852789
BARC68	3	170282360
BARC68	6	7807148	gwm132	2	40782098
BARC69	3	562852022	CFD2	5	529739755
BARC71	3	612586841	WMC631	3	598575494
BARC74	5	350084182	WMS335	5	361748095
BARC76	7	632665106	CFD69	7	631591538
BARC77	3	553040852	BARC143	3	568333698
BARC79	6	67219619	gwm191	1	43601632
BARC80	1	500605788	WMS259	1	476277138
BARC83	1	387101640	BARC269	1	385454310
BARC87	3	30651056	CFD79	3	13053973
BARC92	7	51480092	BARC352	7	39411727
BARC93	5	482991793	gwm212	5	482233291
BARC95	2	14054810	gwm455	2	15688336
BARC96	6	442129885	BARC175	6	435802116
BARC98	2	242111312	BARC18	2	246807769
BARC98	4	263838894	CFD193	4	219068245
BE445653	7	641055804	CFA2240	7	644316517
Bmac0031	7	247257220	Bmac0031	7	247257220
Bmac0047	6	154965674	HVM31	6	126782928
Bmac0144	2	396508387	Bmac0144	2	396508387
Bmac0144	3	553634022	Bmac0144	3	553634022
Bmac0144	3	553634022	Bmac0144	5	573149335
Bmac0144	5	573149335	Bmac0144	3	553634022
Bmac0144	5	573149335	Bmac0144	5	573149335
Bmac0297	1	83168281	Bmag0344	6	87697488
Bmac0297	4	26523608	Bmac0297	4	26523608
Bmac0297	6	221345893	Bmac0297	6	221345893
Bmac144	2	396508387
Bmac144	3	553634022
Bmac144	4	323115736
Bmac297	4	349459755
Bmac297	4	446979362
Bmac297	6	414767416
Bmac31	7	247257220
Bmag0010	3	169314065	Bmag0010	3	169314065
Bmag0110	4	414594784	Bmag0110	4	414594784
Bmag0125	2	506654905	Bmag0125	2	506654905
Bmag0183	7	93743842	Bmag0183	7	93743842
Bmag0228	1	57649712	Bmag0228	1	57649712
Bmag0323	5	71360522	Bmag0323	5	71360522
Bmag0344	4	355153053	Bmag0344	4	355153053
Bmag0344	6	87697488	Bmag0344	6	87697488
Bmag0350	1	372321930	Bmag0350	1	372321930
Bmag0381	2	494411188	Bmag0381	2	494411188
Bmag0394	5	142463452	Bmag0394	5	142463452
Bmag0571	2	359912180	Bmag0350	1	372321930
Bmag0571	7	187613739	Bmag0571	7	187613739
Bmag0749	2	635105564	Bmag0749	2	635105564
Bmag10	3	169314065
Bmag110	4	414594784
Bmag125	2	506654905	Bmac0144	3	553634022
Bmag183	7	93743842
Bmag228	1	57649712
Bmag323	5	71360522	GBM1470	5	70307139
Bmag344	1	111308690
Bmag344	4	355153053
Bmag344	6	296005303
Bmag350	1	372321930
Bmag381	2	494411188	Bmag125	2	506654905
Bmag394	5	142463452
Bmag749	2	635105564
CFA2040	7	626330131	CFA2257	7	641664599
CFA2056	1	471709739	CFA2129	1	423985821
CFA2070	5	125955388	gwm159	5	80129639
CFA2091	4	305622833	GPW7241	4	271104761
CFA2104	5	37054744	gwm205	5	37054893
CFA2104	5	37054744	WMS190	5	9071544
CFA2106	7	89841352	GPW1054	7	90681404
CFA2129	1	423985821	BARC83	1	387101640
CFA2134	3	396109171	DUPW227	3	463684808
CFA2141	5	506542163	WMC97	5	507329060
CFA2147	1	479240463	BARC213	1	484007766
CFA2149	4	519869656	CFD54	4	511151369
CFA2153	1	17301852
CFA2155	5	517668829	CFA2141	5	506544120
CFA2158	1	18628425	WMC329	1	18714642
CFA2164	2	288529876	CFA2263	2	309027755
CFA2170	3	583599324	CFA2170	3	583599324
CFA2174	7	114580790	PSP3035	7	105887293
CFA2185	5	514101758	WMC110	5	529211588
CFA2187	1	474853067	GPW2224	1	492294070
CFA2201	2	38233874	gwm429	2	47439942
CFA2240	7	644316516	CFA2257	7	641664599
CFA2240	7	644316517	BE445653	7	641055804
CFA2250	5	181426313	GPW2098	6	181517987
CFA2257	7	641664599	CFA2040	7	626330131
CFA2262	2	102479264	GPW7325	2	100425758
CFA2263	2	309027755	CFA2164	2	288529876
CFA2278	2	339368933	BARC160	2	304364422
CFA2292	1	496027050	BARC80	1	500605788
CFB12	1	216197478
CFB12	5	193121455
CFB134	3	124980677
CFB3029	3	245558428
CFB3035	5	446899394
CFB3050	5	152335003
CFB3060	3	184366925
CFB3060	5	39464926
CFB3072	5	366002010
CFB3100	3	11579678
CFB3231	3	455506807
CFB3259	3	444310078
CFB3260	3	444310078
CFB3334	2	286902665
CFB3334	5	46175773
CFB3366	1	86218162
CFB3391	3	625727221
CFB3417	3	2705106
CFB3435	3	291552328
CFB3440	2	595790795
CFB3440	5	79653190
CFB3461	2	354844250
CFB3461	6	294641213
CFB37	3	611082799
CFB53	1	233806883
CFB53	2	293773550
CFB53	3	385415359
CFB53	5	320246121
CFB76	6	151362806
CFD1	6	24766860	GPW7073	6	27968287
CFD10	5	550400457	GDM63	5	529204844
CFD102	5	437075849	CFD57	5	438073007
CFD11	2	79984093	gwm484	2	49117097
CFD116	2	207525743	gwm358	2	240945343
CFD127	3	536753466	CFD201	3	489410097
CFD132	6	29941439	WMC749	6	15895215
CFD14	7	264960199	WMC630	5	267264439
CFD15	1	10381597	GDM33	1	653884
CFD152	3	546867451	WMC656	3	523139428
CFD156	5	473103240	WMC434	5	476797484
CFD16	2	580872648	MAG548	2	570031087
CFD160	2	372268554	CFD193	7	412219118
CFD161	2	644616317	BARC159	2	642835886
CFD165	5	5507641	BARC130	5	4846692
CFD168	2	578287658	WMC41	2	576025232
CFD17	2	229009989	gwm358	2	240945343
CFD18	5	6078883	WMC233	5	5507588
CFD188	6	255888892	CFD37	6	272165519
CFD189	5	42620876	CFA2104	5	37054744
CFD19	1	335157321	PSP3037	1	370923526
CFD19	5	496447338	CFD29	5	491219793
CFD19	6	86323268	CFD33	6	59392954
CFD190	6	114242441	gwm325	6	104424731
CFD193	2	135435393
CFD193	4	219068245	BARC98	2	242111312
CFD193	4	219068245	BARC98	4	263838894
CFD193	7	412219118
CFD2	5	529739755	CFA2185	5	514101758
CFD2	7	411170233	WMC182	4	394319688
CFD20	5	501424896	GDM146	5	535148401
CFD201	3	489410097	WMC492	3	470309540
CFD21	1	19019258	CFA2158	1	18628425
CFD21	7	88877441	BARC352	7	39411727
CFD211	3	583013432	WMC552	3	592935460
CFD219	3	193247258	GPW7148	3	173508216
CFD22	7	508633915	gwm131	3	465328499
CFD223	3	573756508	gwm314	3	566130020
CFD233	2	558739759	CFD73	2	551041752
CFD238	2	14919967	gwm614	2	4949149
CFD239	2	639568760	CFD161	2	644616317
CFD242	7	223971654
CFD25	1	10173772	gwm33	1	8881496
CFD25	7	572550294	GDM46	7	537605826
CFD255	2	50070753	GPW4307	2	57768797
CFD26	2	113606390	gwm515	2	121023974
CFD266	5	382751432	WMC799	5	382607935
CFD27	1	434786731	CFD48	1	425837131
CFD28	1	284248260
CFD282	1	489482666	gwm232	1	485503825
CFD283	5	525356375	WMC357	5	509850422
CFD287	6	349977500	WMC786	6	355575240
CFD29	5	491219793	WMC215	5	481783348
CFD3	5	453254755	CFD7	5	448924832
CFD30	6	398254883	GPW2222	6	355575252
CFD30	5	480534795	WMS212	5	482233291
CFD31	7	33574451	gwm296	2	18153491
CFD32	1	369575828	CFD19	1	335157321
CFD33	6	59392954	BARC332	6	16194601
CFD34	3	51770299	CFD64	3	41536408
CFD35	3	115706	WMC11	3	5717554
CFD36	2	14475681	BARC168	2	45709562
CFD37	6	272165519	CFD188	6	255888892
CFD39	4	488002916	GPW4150	4	511826726
CFD4	3	297280857	WMC182	3	278890673
CFD40	5	275321936	BARC1097	5	294493384
CFD41	7	27253598	BARC184	7	12751373
CFD43	2	57891568	BARC168	2	45709562
CFD45	6	481945112	BARC1121	6	461768475
CFD47	6	400626148	CFD76	6	385814797
CFD48	1	425837131	CFA2129	1	423985821
CFD49	6	1591050	BARC173	6	12418485
CFD5	6	479413879	GPW7067	6	478299016
CFD50	2	649870949	CFD239	2	639568760
CFD52	5	383624307	CFD8	5	403543935
CFD53	2	24288298	WMC112	2	24288296
CFD54	4	511151369	gwm6	4	504954451
CFD56	2	98498725	BARC228	2	76698043
CFD57	5	438073007	CFD8	5	403543935
CFD58	1	660809	gwm33	1	8881496
CFD59	1	144430818	WMC611	1	136464709
CFD60	5	390244396
CFD61	1	16594092	CFD21	1	19019258
CFD63	1	446849451	CFD27	1	434786731
CFD64	3	41536408	CFD34	3	51770299
CFD65	1	225312225	GPW1239	1	226757108
CFD68	7	175939387	WMC17	7	137540924
CFD69	7	631591538	BARC76	7	632665106
CFD7	5	448924832	gwm174	5	439702237
CFD71	4	332090884	BARC106	4	283581388
CFD72	1	200427017	CFD65	1	225312225
CFD73	2	551041752	gwm539	2	511843939
CFD73	2	551041752	WMC170	2	570054415
CFD74	5	105794371	GPW5189	5	89540983
CFD74	7	406243871	WMC182	4	394319688
CFD75	6	13632135	BARC332	6	16194601
CFD76	6	385814797	BARC175	6	435802116
CFD77	2	56097263	CFD43	2	57891568
CFD79	3	13053973	BARC147	3	6768470
CFD8	5	403543935	gwm583	5	416292307
CFD80	6	185195513	MAG1470	6	211156036
CFD81	5	48167878	gwm205	5	37054893
CFD83	1	136380748	CFD59	1	144430818
CFD84	4	505714272	CFD54	4	511151369
CFD86	5	526053126	CFD283	5	525356375
CFE1	3	611194687
CFE103	1	266334311
CFE105	3	308796857
CFE106	3	165851594
CFE107	3	586710955
CFE11	4	18372267
CFE110	4	443523606
CFE111	3	481583096
CFE112	5	297761381
CFE113	2	184905944
CFE114	5	471027430
CFE115	4	356402662
CFE118	3	592572589
CFE119	5	504504486
CFE121	5	504504507
CFE124	6	475492672
CFE125	6	475492887
CFE128	1	465863601
CFE128	3	36903440
CFE128	5	438750280
CFE129	3	586710986
CFE13	2	530607957
CFE130	1	71340973
CFE131	3	556731390
CFE132	6	372421913
CFE135	1	287139017
CFE139	4	490181661
CFE140	2	306741629
CFE141	4	2220885
CFE142	4	2220945
CFE143	5	550982758
CFE148	4	3362374
CFE150	1	127795149
CFE153	1	423978894
CFE154	3	79854
CFE154	3	79854
CFE154	4	521671625
CFE154	4	521671625
CFE156	6	457465256
CFE16	5	451250569
CFE162	5	520488266
CFE163	3	408651303
CFE164	6	179367531
CFE169	3	320016845
CFE169	4	39923416
CFE17	5	451250435
CFE170	2	156612296
CFE171	4	23601929
CFE174	2	365362841
CFE175	2	549911015
CFE179	6	489637922
CFE180	2	397337767
CFE180	5	398962504
CFE181	4	404510927
CFE185	3	384752850
CFE186	5	432196441
CFE187	2	527491831
CFE188	4	344796377
CFE190	1	454986547
CFE191	1	464249291
CFE195	3	145689872
CFE196	1	488308196
CFE197	4	480461347
CFE199	4	85452789
CFE2	2	587083688
CFE20	2	489677528
CFE200	4	462244949
CFE201	5	8845524
CFE203	5	430097036
CFE205	4	144403184
CFE206	4	144414182
CFE207	1	380320550
CFE208	3	66204143
CFE209	2	121104482
CFE210	5	547079541
CFE212	2	189983011
CFE213	2	420427114
CFE214	6	390201770
CFE216	6	102742501
CFE218	4	434491974
CFE219	6	167334714
CFE222	6	460363635
CFE225	3	52947350
CFE227	2	13470351
CFE229	5	574497845
CFE23	1	16451443
CFE23	1	16451443
CFE23	5	576290947
CFE23	5	576290947
CFE230	5	574497845
CFE231	5	493529379
CFE232	6	230491799
CFE233	3	1539407
CFE234	5	388568707
CFE235	6	128066769
CFE237	6	187754026
CFE239	4	22699579
CFE239	5	569851501
CFE24	1	16451594
CFE24	1	16451595
CFE24	5	576291083
CFE24	5	576291083
CFE240	5	524466123
CFE242	1	500842808
CFE244	4	439398357
CFE245	5	388568707
CFE246	2	114177160
CFE247	5	346692736
CFE256	4	370375100
CFE257	2	289524536
CFE258	3	432856275
CFE26	1	500837584
CFE262	6	42365873
CFE263	3	62184208
CFE264	1	383817075
CFE266	2	519178120
CFE267	1	421419242
CFE27	3	531437990
CFE270	4	516335199
CFE272	3	160987894
CFE274	2	124271428
CFE277	6	477335590
CFE280	4	477795294
CFE281	2	38068136
CFE281	3	569497098
CFE282	3	122548385
CFE283	1	385457272
CFE285	6	364865703
CFE288	6	179125596
CFE29	3	359430382
CFE292	6	474021513
CFE294	3	604113165
CFE295	3	604113415
CFE297	6	184324701
CFE298	6	184325238
CFE299	1	161709164
CFE3	6	490274572
CFE301	5	574535677
CFE302	3	19963594
CFE31	3	461171483
CFE33	4	514307926
CFE38	4	514308075
CFE4	4	14497738
CFE40	5	385858210
CFE44	4	358964348
CFE46	1	95258868
CFE46	5	144451266
CFE48	1	98243979
CFE48	5	154834668
CFE48	6	16319041
CFE58	2	608172825
CFE6	4	135847341
CFE65	2	22649361
CFE65	5	498707781
CFE66	2	28511374
CFE67	2	28512261
CFE68	2	28511324
CFE68	6	56904278
CFE71	3	418196610
CFE74	6	139033657
CFE75	5	121531629
CFE76	1	408123804
CFE78	2	383630063
CFE79	2	383629833
CFE80	6	409332023
CFE82	5	392742547
CFE84	5	392743451
CFE87	6	2806410
CFE92	2	14515969
CFE93	6	355619896
CFE94	6	378708627
CFE95	6	487268283
CFE96	2	265187435
CWEM10	1	156293128
CWEM16	2	111179835
CWEM19	3	451622290
CWEM34	4	308152499
CWEM35	1	209709019
CWEM35	6	355620126
CWEM38	4	465146496
CWEM39	4	32803042
CWEM4	5	376188790
CWEM40	5	140770552
CWEM41	5	326902266
CWEM42	5	70305466
CWEM46	6	57208607
CWEM47	6	140369900
CWEM48	6	293672855
CWEM49	6	129489145
CWEM5	1	471402193
CWEM51	6	378708123
CWEM54	2	620425308
CWEM6	1	11748911
CWEM7	1	434853899
CWEM7	2	186861156
CWEM7	6	258871163
CWM107	1	479946839
CWM107	5	446477943
CWM130	1	411173224
CWM130	2	50776482
CWM161	1	417615800
CWM161	4	391983504
CWM170	4	520859011
CWM170	6	229278043
CWM172	1	161709238
CWM173	1	161709238
CWM176	2	300562623
CWM176	5	498708644
CWM178	1	316933122
CWM178	2	529028399
CWM209	3	423086579
CWM213	1	107144365
CWM215	2	443653472
CWM216	5	369674523
CWM216	6	62817697
CWM217	5	326900451
CWM221	3	471642208
CWM224	5	619568
CWM227	2	265187351
CWM23	5	538548230
CWM232	5	532027602
CWM243	2	118155826
CWM244	1	281730416
CWM244	2	118155794
CWM262	5	386699852
CWM272	2	14515749
CWM290	5	388727875
CWM291	2	355534336
CWM294	5	446478040
CWM295	5	446478040
CWM306	6	211156056
CWM308	5	133865689
CWM311	2	483489783
CWM313	3	61830185
CWM329	2	585665068
CWM330	1	121728725
CWM330	6	169495033
CWM331	2	641095764
CWM331	6	363152206
CWM332	1	135028740
CWM335	1	387136954
CWM336	1	387137433
CWM344	2	403049517
CWM345	2	81942414
CWM348	2	81942391
CWM349	6	352067498
CWM350	5	571393514
CWM355	2	27579349
CWM355	3	220955837
CWM360	3	418196517
CWM363	1	209424372
CWM364	5	72637261
CWM369	4	6843724
CWM37	6	373808115
CWM371	6	155906971
CWM372	2	443653408
CWM379	1	362458985
CWM385	4	6843724
CWM386	4	6843724
CWM387	4	6843724
CWM392	6	357335014
CWM395	4	383562194
CWM401	1	385819226
CWM401	2	443653908
CWM409	2	594996112
CWM411	1	385819543
CWM411	3	482889113
CWM411	4	490776373
CWM412	4	490776857
CWM412	6	444486498
CWM416	2	278949468
CWM419	6	444486998
CWM422	6	309148974
CWM424	2	323582156
CWM425	5	386747172
CWM432	6	923017
CWM436	4	38839594
CWM441	5	227469219
CWM442	2	492420008
CWM447	2	403049517
CWM452	2	444673149
CWM453	3	612562495
CWM454	1	241213221
CWM455	6	309149591
CWM458	2	35143315
CWM46	3	308796706
CWM460	6	352067498
CWM465	2	587083734
CWM468	2	601960213
CWM471	1	408123732
CWM472	2	397337637
CWM473	1	487574575
CWM476	1	408123734
CWM477	2	63049019
CWM484	3	451622100
CWM486	5	551141984
CWM487	6	487299106
CWM489	4	295707707
CWM491	2	551926566
CWM492	6	317298477
CWM496	6	405300446
CWM497	2	157001710
CWM497	5	522174896
CWM497	5	522174896
CWM498	6	405300917
CWM502	2	141887900
CWM505	2	140830379
CWM506	1	9989686
CWM507	3	471642205
CWM508	2	511494417
CWM515	2	140830378
CWM515	3	622817296
CWM516	1	315133762
CWM518	2	33190458
CWM518	6	64681841
CWM524	3	592883614
CWM526	3	91694208
CWM532	6	211156113
CWM547	1	116524236
CWM548	6	332635289
CWM549	1	237112168
CWM559	2	481881365
CWM561	2	379004689
CWM561	4	124787675
CWM567	5	550982888
CWM568	2	492254519
CWM569	4	124787676
CWM569	6	378708541
CWM571	2	459228752
CWM580	1	135738990
CWM586	6	378708542
CWM587	6	347610361
CWM590	1	405260092
CWM591	6	129489143
CWM592	5	430096699
CWM594	4	126496176
CWM595	2	355536511
CWM94	5	574535675
DUPW108	4	383924128
DUPW115	2	561094390
DUPW115	5	14289760
DUPW123	3	588568837
DUPW135	5	576666704
DUPW165	5	391934624
DUPW165	6	182476626
DUPW167	6	495079944	gwm427	6	464989647
DUPW168	6	341433298
DUPW205	5	388568656	gwm335	5	361748095
DUPW217	6	2130286
DUPW227	3	463684548	WMC418	3	473904622
DUPW23	4	85452807
DUPW238	4	124530739
DUPW38	1	452378533	CFA2129	1	423985821
DUPW43	4	521409015
FCP393	5	456255789
GBM1118	3	297162590
GBM1153	1	361739735	Bmac0144	2	396508387
GBM1162	3	418531202
GBM1172	2	323582144	GMS003	2	351628212
GBM1174	7	519667577
GBM1187	2	13709746	HVM36	2	28120732
GBM1208	2	535722488	GBM1309	2	549911130
GBM1213	3	295526631	GBM1425	3	326332495
GBM1222	5	70307138	GBM5028	5	35283120
GBM1234	1	261903016	GBM1311	1	283775275
GBM1251	2	62444833	HVM36	2	28120732
GBM1275	1	264463288
GBM1275	2	15688336
GBM1275	6	483077558	GBM1276	6	483077313
GBM1276	6	483077313	GBM1275	6	483077558
GBM1293	5	299398189
GBM1309	2	549911130	GBM1208	2	535722488
GBM1311	1	283775275	GBM1234	1	261903016
GBM1355	6	41642622
GBM1356	6	458527312	scssr05599	6	453748913
GBM1363	5	467865943	GBM5008	5	446477963
GBM1364	4	336451362	Bmag0350	1	372321930
GBM1366	2	354837250	GBM1172	2	323582144
GBM1405	3	504157779
GBM1425	3	326332495	GBM1213	3	295526631
GBM1432	7	169593084
GBM1440	2	535722488	Bmac0144	3	553634022
GBM1440	2	535722488	Bmac0144	5	573149335
GBM1446	2	96171670	GBM1251	2	62444833
GBM1464	7	95666942
GBM1465	4	11168481
GBM1470	5	70307139	Bmag323	5	71360522
GBM1492	7	434576822	Bmag0110	4	414594784
GBM1509	4	409744026	HVM68	4	434878175
GBM5008	5	446477963	GBM1363	5	467865943
GBM5028	5	35283120	scssr02503	5	70307239
GBM5210	4	439376957	GBM1509	4	409744026
GDM101	2	295286621	gwm473	2	306300055
GDM108	6	58421309	GDM127	6	71617026
GDM111	1	490231973	BARC62	1	500341922
GDM114	5	32912861
GDM125	4	450440245	WMC331	4	459606283
GDM126	1	462918557	WMC732	1	439729329
GDM127	6	71617026	WMC113	6	46092815
GDM132	6	13632245	BARC173	6	12418485
GDM133	5	513557083	CFA2185	5	514101758
GDM136	1	10842916	CFD15	1	10381597
GDM136	3	422563866	BARC1161	3	440874994
GDM138	5	397913194	gwm583	5	416292307
GDM14	1	190989733
GDM14	6	306940680	gwm55	6	306940691
GDM141	6	269068922
GDM145	7	32934513	CFD41	7	27253598
GDM146	5	535148401	WMC813	5	552248027
GDM148	2	219043324
GDM150	7	611154590	GDM67	7	641076149
GDM153	5	447419299	gwm174	5	439702237
GDM19	1	265179585	WMC429	1	283097051
GDM28	1	31415313	GDM33	1	653884
GDM3	5	276997782	BARC28	1	321942166
GDM33	1	653884	CFD15	1	10381597
GDM35	2	13512123	GDM5	2	15688359
GDM36	6	27849661	CFD132	6	29941439
GDM38	3	625169541	gwm3	3	590826241
GDM46	7	537605826	BARC121	7	532772325
GDM5	2	15688359	BARC95	2	14054810
GDM60	1	146792963
GDM63	5	529204844	WMC160	5	508328029
GDM67	7	641076149	GDM150	7	611154590
GDM68	5	249893505	WMC608	5	224167809
GDM72	3	65600946	WMC549	3	54400020
GDM77	2	10827568
GDM84	7	237011027
GDM86	7	18768292
GDM88	7	32934513	GDM145	7	32934513
GDM93	2	629070317	CFD50	2	649870949
GDM98	6	479413954	WMC773	6	483911209
GDM99	5	446697556	GDM138	5	397913194
GDM99	7	552523617	BARC172	7	511394913
GMS003	2	351628212	GMS003	2	351628212
GMS3	2	351628212	HVM23	2	371686945
GMS6	6	126660478
GPW1008	1	21252765
GPW1008	3	76618968
GPW1009	7	582540442	BARC111	7	593406563
GPW1019	6	94306777	gwm325	6	104424731
GPW1034	6	16767480	GPW4465	6	14466939
GPW1045	7	636590996
GPW1054	7	90681404	CFA2106	7	89841352
GPW1056	5	14139514	gwm191	1	43601632
GPW1062	3	424090077	GPW4431	3	415217894
GPW107	1	98952633
GPW1077	1	494509663	CFD282	1	489482666
GPW1106	3	2011484	WMC11	3	5717554
GPW1109	2	140105108	GPW4149	2	151058184
GPW1135	5	26823663
GPW1144	7	617372334	WMC166	7	626829335
GPW1148	2	58075811	gwm257	2	29099408
GPW1149	3	532055194	CFD152	3	546867451
GPW1164	7	290638794	gwm43	4	336509781
GPW1168	3	84571087	GPW4163	3	100917486
GPW1170	1	7577756	GPW7059	1	4891409
GPW1173	4	37819285
GPW1173	5	391934625
GPW1184	2	565734485	CFD73	2	551041752
GPW1214	2	506746158
GPW1239	1	226757108	CFD65	1	225312225
GPW124	2	641905083
GPW125	2	128042445
GPW134	1	316933122
GPW134	4	37819284
GPW134	6	330516309
GPW146	1	199654974
GPW154	3	535609480
GPW167	3	46923013
GPW2010	2	567784545
GPW2016	3	261003165
GPW202	1	140669446
GPW202	6	268190605
GPW2059	5	529112278	GPW2328	5	522490864
GPW2071	1	464134424	gwm268	1	469324002
GPW2075	3	50870060
GPW2082	6	39770472	GPW3087	6	26703193
GPW2098	4	451234493
GPW2098	5	41751569	gwm205	5	37054893
GPW2098	6	181517987
GPW2115	1	336686237	BARC28	1	321942166
GPW2119	7	133226251	GPW7386	4	99085417
GPW2119	7	133226251	GPW7386	4	99085417
GPW2128	2	26872919
GPW2140	4	70644572	WMC89	4	70644544
GPW2142	1	15468175	GPW7006	1	38917149
GPW2160	7	368933629
GPW2162	1	23967670	GPW5253	1	21639590
GPW2169	3	419183780	GPW4092	3	370337977
GPW220	6	151035240
GPW2216	6	488772972
GPW2220	4	7453965
GPW2222	6	355575252	CFD30	6	398254883
GPW2224	1	492294070	GDM111	1	490231973
GPW2225	2	206025758	GPW5162	2	200713093
GPW2229	2	604535817	gwm47	2	581225032
GPW2232	6	455217979	GPW5130	6	423488682
GPW2238	2	482353884
GPW2239	4	451878223	WMC173	3	445693965
GPW2243	5	459178319	gwm271	5	462769675
GPW2246	1	7209264	GDM33	1	653884
GPW2253	2	358169593
GPW2264	7	222008553	gwm16	5	242821006
GPW2269	7	400700437	gwm540	4	405679187
GPW2271	4	140485296	GPW336	4	130395131
GPW2272	2	89603742	GPW4273	2	134056948
GPW2273	4	524364393	CFD39	4	488002916
GPW2275	5	316147374	GPW3217	5	326902099
GPW2298	6	73394576
GPW2302	4	397403098
GPW2323	5	576008193	CFD25	7	572550294
GPW2328	5	522490864	GPW2059	5	529112278
GPW297	3	64443231	CFD34	3	51770299
GPW298	5	481783264	CFD29	5	491219793
GPW299	7	90845662	CFA2174	7	114580790
GPW3003	5	67206832	gwm293	5	102263741
GPW303	5	427138240	GPW5098	5	425703927
GPW3032	2	627995942
GPW3035	5	259252791	GPW7244	5	292611763
GPW304	6	141407323	GPW5172	6	139341564
GPW3069	1	203114656	GPW3261	1	190559915
GPW307	3	625169582	GPW5271	3	626230354
GPW3072	1	199654975
GPW3072	5	371473292
GPW3076	5	522499070	CFA2141	5	506542163
GPW308	2	607685947	GPW5237	2	610367473
GPW3082	4	97366671
GPW3087	6	26703193	GPW2082	6	39770472
GPW3092	3	22688489	CFD79	3	13053973
GPW3101	6	144748981	CFD190	6	114242441
GPW3105	2	232400255	WMC144	2	268732605
GPW3107	2	630187017	CFD239	2	639568760
GPW3109	3	324218199	CFD4	3	297280857
GPW311	4	492315275	gwm251	4	461640000
GPW3111	7	439000563
GPW315	1	422929264	gwm642	1	419300752
GPW3183	5	497127916	WMS604	5	542947487
GPW3188	7	134434711
GPW3193	5	274007411	GDM68	5	249893505
GPW3217	5	326902099	GPW2275	5	316147374
GPW322	3	27017008	WMC43	3	27034182
GPW323	5	569630205	GPW2323	5	576008193
GPW3241	6	406035704	WMC182	4	394319688
GPW3256	1	248761433	GPW3069	1	203114656
GPW326	5	1030681	WMS190	5	9071544
GPW3261	1	190559915	GPW3069	1	203114656
GPW332	2	31091434	GPW5176	6	21084823
GPW333	3	135042825	GPW5216	3	143011303
GPW335	5	569157613	GPW323	5	569630205
GPW336	4	130395131	GPW2271	4	140485296
GPW338	2	615731119	GPW5237	2	610367473
GPW341	5	351779383	GPW4020	5	341806131
GPW342	4	451234493	GPW4538	4	420668169
GPW343	5	524396539	CFD283	5	525356375
GPW345	4	519208305	GPW5161	4	516232443
GPW346	2	302442512	BARC145	2	283837853
GPW349	2	453663231	GPW5020	2	441604526
GPW350	7	308602829	CFD14	7	264960199
GPW354	2	622220296	GPW5143	2	633813873
GPW357	1	403496340	WMC93	1	421675320
GPW358	5	292916232	GPW7218	5	297478393
GPW361	2	107952668	CFA2262	2	102479264
GPW362	6	475503129	GPW2232	6	455217979
GPW4007	2	317707793
GPW4007	6	486627445
GPW4020	5	341806131	GPW4492	5	302051591
GPW4024	4	493103688	GPW7390	4	492745519
GPW4032	6	9709470	GPW7292	6	4260925
GPW4040	4	342613848	GPW7259	4	353269704
GPW4050	7	640898383	SCAR3362	7	631895905
GPW4066	7	384887342
GPW4074	3	38763874	GPW2142	1	15468175
GPW4081	3	523139387	GPW5193	3	519050329
GPW4085	2	57764789	WMC83	2	12891333
GPW4092	3	370337977	GPW2169	3	419183780
GPW4093	5	348991577	GPW3217	5	326902099
GPW4099	5	458832962
GPW4101	4	225895471
GPW4103	2	51146673	GPW4396	2	24936000
GPW4115	1	324504500	WMC156	1	303200620
GPW4117	4	80650929
GPW4132	4	407329151	GPW4461	4	438479610
GPW4136	3	585014463	CFD223	3	573756508
GPW4138	6	447742849	gwm182	5	447137961
GPW4142	6	356065615	CFD30	6	398254883
GPW4149	2	151058184	GPW1109	2	140105108
GPW4150	4	511826726	CFD39	4	488002916
GPW4152	3	89974327	CFD34	3	51770299
GPW4154	6	137418089	GPW7813	6	115913662
GPW4156	3	465202981
GPW4160	3	9747324
GPW4162	6	380226826	GPW8068	6	405273686
GPW4163	3	100917486	GPW297	3	64443231
GPW4165	2	138457070
GPW4176	2	420512745	GPW5209	2	404024696
GPW4189	4	57844873	WMC48	4	70644550
GPW4207	2	453928021
GPW4221	3	83540600	WMS2	3	50957578
GPW4225	3	177751759	GPW5288	2	173823208
GPW4228	5	410379009	GPW5207	5	431907206
GPW4231	2	73440467
GPW4247	2	317707792
GPW4247	5	398962442
GPW4248	4	336996347	GPW7414	4	328173250
GPW4251	4	76621249	GPW4315	4	70644064
GPW4254	4	30672631	GPW7521	4	13419907
GPW4261	2	387537884
GPW4273	2	134056948	GPW2272	2	89603742
GPW4305	1	215449304
GPW4307	2	57768797	GPW4085	2	57764789
GPW4308	6	426058097	GPW5076	6	442416546
GPW4309	6	190097713	GPW4350	6	149409280
GPW4310	3	465329292	gwm108	2	462822704
GPW4311	1	465409723	GPW7258	1	465192712
GPW4312	6	283193356	GPW4344	6	296476400
GPW4313	1	237053361
GPW4315	4	70644064	GPW4189	4	57844873
GPW4329	6	3743435	GPW3087	6	26703193
GPW4331	1	127811206	gwm11	1	133810048
GPW4344	6	296476400	GPW4312	6	283193356
GPW4347	6	239948995	GPW4312	6	283193356
GPW4350	6	149409280	GPW4309	6	190097713
GPW4351	1	450279254
GPW4352	3	492598808	GPW4466	3	516520991
GPW4357	6	3767879	CFD49	6	1591050
GPW4372	6	478784462	GPW362	6	475503129
GPW4373	1	362749983	GPW4092	3	370337977
GPW4382	2	214950698	WMC245	2	188301845
GPW4386	2	5145652
GPW4389	4	238100022	GPW7241	4	271104761
GPW4390	2	277272850	gwm16	5	242821006
GPW4394	5	296693754
GPW4395	6	475502909
GPW4396	2	24936000	GPW4103	2	51146673
GPW4401	3	156301110
GPW4403	1	74915385
GPW4412	4	370534517	gwm513	4	366891437
GPW4431	3	415217894	gwm131	5	443385344
GPW4440	6	45881935	CFD132	6	29941439
GPW4448	4	162914049	CFA2174	7	114580790
GPW4450	2	153017843	gwm339	2	113286768
GPW4451	3	413256041	GPW4431	3	415217894
GPW4456	2	67307269
GPW4461	4	438479610	GPW4132	4	407329151
GPW4463	5	372416200
GPW4465	6	14466939	GPW1034	6	16767480
GPW4466	3	516520991	GPW4352	3	492598808
GPW4469	2	158664729	GPW4450	2	153017843
GPW4473	2	39785628	gwm261	2	20395218
GPW4474	2	639493108	gwm382	2	639493107
GPW4475	5	134431286	gwm358	5	134582749
GPW4478	1	410608045	gwm131	5	443385344
GPW4479	5	508328039	GPW3076	5	522499070
GPW4480	2	525661807	gwm539	2	511843939
GPW4491	5	302051593	GPW4492	5	302051591
GPW4492	5	302051591	GPW4491	5	302051593
GPW4503	1	116366243	CFD19	6	86323268
GPW4507	4	359993129
GPW4525	5	431306702	CFD2	7	411170233
GPW4538	4	420668169	GPW4132	4	407329151
GPW4545	4	507358501	gwm4	4	522012375
GPW5001	3	559003693	GPW5263	3	581306342
GPW5010	4	488528359	CFD39	4	488002916
GPW5020	2	441604526	GPW4176	2	420512745
GPW5029	5	517998296	GPW8261	5	525957148
GPW5041	2	620542334	GPW354	2	622220296
GPW5062	4	318657685	GPW4040	4	342613848
GPW5064	3	585100048	GPW4136	3	585014463
GPW5066	3	619131046	GPW5203	3	620167697
GPW5067	3	576536334	GPW5198	3	606268227
GPW5069	6	198710623
GPW5072	4	123965338	GPW8038	4	123950998
GPW5076	6	442416546	GPW4308	6	426058097
GPW5082	1	479365159	GPW4311	1	465409723
GPW5084	5	504770748	CFD19	5	496447338
GPW5090	2	473037894	GPW5141	2	453888924
GPW5092	2	77763576	gwm102	2	72949622
GPW5094	3	595878567	GPW5067	3	576536334
GPW5098	5	425703927	GPW303	5	427138240
GPW5104	3	107323755	GPW5216	3	143011303
GPW5111	2	650479289	GPW5239	2	640485316
GPW5118	2	68734969	GPW361	2	107952668
GPW5122	2	5937530	GPW5177	3	50955969
GPW5123	3	20779613
GPW5125	6	491317242	GPW7388	6	491334229
GPW5126	1	441428044	gwm642	1	419300752
GPW5129	5	278344846	GPW7244	5	292611763
GPW5130	6	423488682	WMC182	4	394319688
GPW5134	5	211472221	gwm358	2	240945343
GPW5135	6	382251887	GPW8068	6	405273686
GPW5139	3	207821879	GPW5166	3	210615019
GPW5140	7	562302241	CFD25	7	572550294
GPW5141	2	453888924	GPW5090	2	473037894
GPW5143	2	633813873	GPW354	2	622220296
GPW5144	4	323989680	GPW4040	4	342613848
GPW5149	1	144430360	CFD59	1	144430818
GPW5161	4	516232443	GPW345	4	519208305
GPW5162	1	441428044	CFA2147	1	479240463
GPW5162	2	200713093	GPW4149	2	151058184
GPW5163	2	396543731
GPW5166	3	210615019	GPW5139	3	207821879
GPW5168	6	295767411	GDM14	6	306940680
GPW5170	6	362253821	CFD47	6	400626148
GPW5171	5	499093043	GPW5084	5	504770748
GPW5172	6	139341564	GPW304	6	141407323
GPW5176	6	21084823	GPW3087	6	26703193
GPW5177	3	50955969	GPW5281	3	50955736
GPW5179	6	483886603	GPW7433	6	495079733
GPW5183	6	370397933
GPW5185	4	229982113	GPW7666	4	261745342
GPW5187	1	214382727
GPW5187	2	469539722
GPW5187	6	443759800
GPW5188	3	621244923	GPW5203	3	620167697
GPW5189	5	89540983	GPW5201	5	87705590
GPW5191	4	448296862	GPW342	4	451234493
GPW5193	1	660803
GPW5193	3	519050329	GPW4081	3	523139387
GPW5194	3	178231249	GPW7148	3	173508216
GPW5195	1	499109073
GPW5197	5	317537464	GPW7238	5	300181776
GPW5198	3	606268227	GPW7114	3	586180508
GPW5201	5	87705590	GPW5189	5	89540983
GPW5203	3	620167697	GPW5188	3	621244923
GPW5205	6	489493245	GPW5125	6	491317242
GPW5206	5	462552272	CFD156	5	473103240
GPW5207	5	431907206	GPW4228	5	410379009
GPW5208	7	39582917
GPW5209	2	404024696	CFD2	7	411170233
GPW5210	6	487226958	GPW5125	6	491317242
GPW5212	2	53586262	gwm484	2	49117097
GPW5216	3	143011303	GPW333	3	135042825
GPW5220	5	529207759
GPW5235	3	581306342	GPW5263	3	581306342
GPW5237	2	610367473	GPW308	2	607685947
GPW5238	5	529207759	GPW3076	5	522499070
GPW5239	2	640485316	GPW5111	2	650479289
GPW5244	2	614971336	GPW338	2	615731119
GPW5245	6	268357697	CFD37	6	272165519
GPW5248	3	12309388	GPW7553	3	11852199
GPW5253	1	21639590	GPW2162	1	23967670
GPW5255	4	522658021	GPW345	4	519208305
GPW5257	3	260790554	CFD4	3	297280857
GPW5257	5	249100263
GPW5260	1	234197521	GDM19	1	265179585
GPW5261	1	384509729
GPW5262	2	272633131
GPW5263	3	581306342	GPW5001	3	559003693
GPW5271	3	626230354	GPW307	3	625169582
GPW5281	3	50955736	GPW5177	3	50955969
GPW5281	5	518577858	GDM133	5	513557083
GPW5288	2	173823208	GPW5292	2	188678295
GPW5288	3	277081671	gwm72	3	282678008
GPW5288	4	324781760	GPW7414	4	328173250
GPW5292	2	188678295	GPW5288	2	173823208
GPW5314	4	471626629	CFD39	4	488002916
GPW7002	6	364865672
GPW7004	2	301008778
GPW7006	1	38917149	GPW2142	1	15468175
GPW7007	5	452980376	GPW5207	5	431907206
GPW7017	1	38902216
GPW7017	3	534003167
GPW7020	4	2220867	GPW7565	4	14624686
GPW7026	4	24757029
GPW7030	6	403310646
GPW7038	3	341327555
GPW7046	5	333858023
GPW7048	4	45717319
GPW7059	1	4891409	PSP3000	1	4927674
GPW7060	6	27742238	GPW3087	6	26703193
GPW7064	5	117586615
GPW7066	4	412177621
GPW7067	6	478299016	CFD5	6	479413879
GPW7073	6	27968287	CFD1	6	24766860
GPW7076	6	27911995	GPW7073	6	27968287
GPW7082	1	6186041	gwm33	1	8881496
GPW7084	3	471642204
GPW7085	1	176274139
GPW7085	6	175482424
GPW7090	5	253358000
GPW7093	1	60214472
GPW7101	2	73850820	GPW5177	3	50955969
GPW7105	5	545819353
GPW7106	1	282884399
GPW7107	5	507209907
GPW7109	1	16594002	WMC329	1	18714642
GPW7113	1	41392049
GPW7114	3	586180508	GPW5064	3	585100048
GPW7138	1	28075987
GPW7138	3	499229314
GPW7138	5	16322591
GPW7148	3	173508216	GPW5194	3	178231249
GPW7180	5	31728826
GPW7194	3	180592542
GPW7196	4	124530782	GPW8038	4	123950998
GPW7202	1	313797395
GPW7204	5	257646168
GPW7206	3	91693775
GPW7207	2	494230859
GPW7213	3	621793743	GPW7219	3	626687288
GPW7218	5	297478393	GPW358	5	292916232
GPW7219	3	626687288	GPW7213	3	621793743
GPW7220	3	377333629	GPW4431	3	415217894
GPW7225	2	420427193
GPW7226	2	624702629
GPW7237	6	109934790
GPW7238	5	300181776	CFD40	5	275321936
GPW7241	4	271104761	CFA2091	4	305622833
GPW7244	5	292611763	GPW3035	5	259252791
GPW7246	5	555376248
GPW7250	1	255282377
GPW7250	2	639382891
GPW7250	5	562180280
GPW7253	5	545819156
GPW7255	1	4962835
GPW7258	1	465192712	GPW4311	1	465409723
GPW7259	4	353269704	GPW4040	4	342613848
GPW7262	6	484620248	GPW5076	6	442416546
GPW7272	4	488652611	GPW5010	4	488528359
GPW7284	3	440775533
GPW7285	2	211661043	GPW3105	2	232400255
GPW7286	1	54877862
GPW7286	3	66202242
GPW7292	6	4260925	GPW4032	6	9709470
GPW7296	1	176273872
GPW7308	1	499229950
GPW7309	5	400971874	gwm213	5	361748065
GPW7314	1	248288942
GPW7314	3	626813947
GPW7321	3	1998601	CFD35	3	115706
GPW7325	2	100425758	GPW5092	2	77763576
GPW7330	6	424438161
GPW7331	2	648385014	GPW5041	2	620542334
GPW7332	5	96681845
GPW7346	5	449071748	CFD7	5	448924832
GPW7352	2	231672488
GPW7354	5	92913931
GPW7371	1	371445635
GPW7379	2	146494678	WMC245	2	188301845
GPW7384	6	445975452	WMC256	6	426935091
GPW7386	4	99085417
GPW7386	4	99085417
GPW7386	5	556377861
GPW7386	5	556377861
GPW7388	6	491334229	GPW5125	6	491317242
GPW7390	4	492745519	GPW2328	5	522490864
GPW7391	3	623520265
GPW7391	5	85622496
GPW7399	2	166137967
GPW7404	3	7421498
GPW7409	1	322349268
GPW7409	3	623520266
GPW7411	2	481881448
GPW7412	1	51797542	CFD61	1	16594092
GPW7414	4	328173250	GPW4248	4	336996347
GPW7416	4	54480747
GPW7419	5	326602140	gwm335	5	361748095
GPW7421	1	288706306
GPW7422	1	288706459
GPW7425	5	537158897
GPW7433	6	495079733	GPW5179	6	483886603
GPW7435	5	528539012
GPW7438	2	125080277
GPW7443	1	500834195	GPW1077	1	494509663
GPW7451	1	412801555
GPW7452	3	19595522	WMC43	3	27034182
GPW7454	1	253822772
GPW7454	4	371496119
GPW7454	6	419899643
GPW7455	6	149239504
GPW7461	1	322348767
GPW7461	4	308366620
GPW7463	1	300169666
GPW7463	2	60238502
GPW7467	3	125708934
GPW7468	2	29862834
GPW7468	3	475906336
GPW7478	3	54852176
GPW7478	5	351985235
GPW7479	4	53205873
GPW7481	2	636759721
GPW7481	3	142064160
GPW7481	6	461334871
GPW7485	1	437913401
GPW7489	3	469091829
GPW7501	2	625732284
GPW7506	2	616639509	GPW4474	2	639493108
GPW7509	3	517235900
GPW7509	5	289387622
GPW7510	6	340091689
GPW7516	3	7160793
GPW7520	1	421672838
GPW7521	4	13419907	GPW4254	4	30672631
GPW7533	2	498212332
GPW7533	4	115376408
GPW7533	5	3692071
GPW7533	5	3692136
GPW7543	4	9559894
GPW7544	3	495821087
GPW7544	5	289387621
GPW7553	3	11852199	GPW5248	3	12309388
GPW7554	6	29160477	GPW7076	6	27911995
GPW7562	2	6233960
GPW7562	5	388688792
GPW7563	6	485982941
GPW7565	4	14624686	GPW7020	4	2220867
GPW7568	5	396781543
GPW7570	2	616828418	gwm382	2	639493107
GPW7573	2	177451256
GPW7574	5	286369316	GPW7244	5	292611763
GPW7577	1	480506494	CFA2147	1	479240463
GPW7578	5	417983299
GPW7580	3	514935438
GPW7580	6	447659559
GPW7586	3	538540448	GPW5193	3	519050329
GPW7592	6	87130046	GPW2082	6	39770472
GPW7603	1	346075334	WMC156	1	303200620
GPW7607	5	44268724	gwm205	5	37054893
GPW7609	5	111240014
GPW7614	2	44273472
GPW7614	3	495821086
GPW7614	6	96531867
GPW7615	4	500430268	GPW7672	4	494703215
GPW7620	2	568169456	CFD233	2	558739759
GPW7626	1	278265445
GPW7631	3	145022017
GPW7635	3	503572208
GPW7636	1	70278421
GPW7641	2	339368392	gwm55	6	306940691
GPW7643	3	486136067	CFD201	3	489410097
GPW7649	6	394953425	GPW4162	6	380226826
GPW7651	6	118130724
GPW7660	2	44273472
GPW7666	4	261745342	GPW5185	4	229982113
GPW7672	4	494703215	GPW4024	4	493103688
GPW7678	1	98247772
GPW7680	5	388568647
GPW7682	2	116174747
GPW7682	6	64815193
GPW7684	5	382552941
GPW7717	5	529528519
GPW7727	2	604578969	GPW2229	2	604535817
GPW7739	6	261224491
GPW7749	2	457001637
GPW7751	4	477849464
GPW7760	1	214111482
GPW7760	2	451306464
GPW7760	4	382938017
GPW7760	5	262689958
GPW7772	2	645218610	CFD50	2	649870949
GPW7774	3	28451708	CFD79	3	13053973
GPW7795	4	507504722	GPW7615	4	500430268
GPW7796	6	3232425
GPW7797	5	264142284
GPW7805	3	446057106	gwm131	3	465328499
GPW7805	3	446057106	gwm131	5	443385344
GPW7808	2	469365917	gwm55	2	505283569
GPW7812	1	306020801
GPW7813	6	115913662	GPW4154	6	137418089
GPW8003	2	477448599	GPW8004	2	477448586
GPW8004	2	477448586	GPW8003	2	477448599
GPW8034	2	644628689	gwm382	2	639493107
GPW8038	4	123950998	GPW7196	4	124530782
GPW8048	4	517915004	gwm6	4	504954451
GPW8060	4	386459363	GPW8060	4	386459363
GPW8062	5	388568707
GPW8063	1	46525298
GPW8068	6	405273686	GPW4162	6	380226826
GPW8072	3	415791768
GPW8076	1	239577183
GPW8082	1	297088967
GPW8107	4	332314675
GPW8116	3	438430866	GPW4310	3	465329292
GPW8126	2	352300246
GPW8134	2	479536325	gwm55	2	505283569
GPW8147	1	325329071
GPW8147	2	477453132
GPW8157	3	613172057
GPW8175	3	129994025
GPW8260	6	35045222
GPW8261	5	525957148	GPW5029	5	517998296
GPW8288	6	181923835
GPW8295	3	512165198
GPW8295	5	500142530
GPW93020	2	315047767
GPW94	2	607444625
GPW94005	1	471220601
GPW94015	2	371554413
GPW94018	5	474412936
GPW94023	3	157021300
GPW94025	3	553285824
GPW94034	5	304019459
GPW94042	4	32077057	BARC105	4	38839695
GPW94051	6	492348516
GPW94052	3	601553064
GPW94056	3	519277192
GPW94056	5	454352303
GPW94062	3	71442993
GPW95001	4	413407402
GPW95009	3	207821909
GPW95009	5	179226602
GPW95012	4	309162972
GPW95029	2	284557669
GPW95029	4	180797767
GPW95032	3	612536071
GPW95032	4	365714350
gwm102	2	72949622	WMC453	2	57870354
gwm106	1	20244905	CFA2158	1	18628425
gwm107	6	459272955
gwm108	2	462822704
gwm11	1	133810048	BARC120	1	128563906
gwm112	3	472721396	gwm108	2	462822704
gwm120	2	10033839	gwm191	1	43601632
gwm121	5	462640300	WMC289	5	462769712
gwm131	3	465328499	BARC164	3	454950735
gwm131	5	443385344
gwm132	2	40782098	WMC382	2	1377767
gwm133	1	26266970	GDM36	6	27849661
gwm133	3	212225379
gwm133	5	75058463	gwm159	5	80129639
gwm133	6	295761951	gwm55	6	306940691
gwm135	1	382584965	BARC83	1	387101640
gwm144	3	134993150
gwm148	2	23663041	WMC453	2	57870354
gwm149	4	445992369	CFD39	4	488002916
gwm159	5	80129639	gwm133	5	75058463
gwm16	5	242821006	gwm358	2	240945343
gwm161	3	7462618	WMC11	3	5717554
gwm162	3	619045611	BARC28	3	615520979
gwm174	5	439702237	CFD57	5	438073007
gwm182	5	447137961	CFD102	5	437075849
gwm190	5	9071544	CFD18	5	6078883
gwm191	1	43601632	BARC119	1	36518289
gwm205	5	37054893	BARC301	6	11154593
gwm210	2	5897248	BARC124	2	4442173
gwm212	5	482233291	gwm292	5	476987190
gwm213	5	361748065	gwm335	5	361748095
gwm232	1	485503825	CFD63	1	446849451
gwm249	2	142528840	gwm515	2	121023974
gwm251	4	461640000	BARC227	4	460699025
gwm257	2	29099408	gwm429	2	47439942
gwm261	2	20395218	WMC25	2	19903391
gwm268	1	469324002	gwm544	1	440091449
gwm269	5	569181525	gwm565	5	569181533
gwm271	5	462769675	GPW2243	5	459178319
gwm272	5	576667751	WMC443	5	570552720
gwm274	5	61808770
gwm275	2	95537952	gwm515	2	121023974
gwm291	5	524160202	gwm6	4	504954451
gwm292	5	476987190	CFD3	5	453254755
gwm293	5	102263741	BARC1182	5	106229147
gwm294	2	577200226	WMC170	2	570054415
gwm296	2	18153491	WMC382	2	1377767
gwm3	3	590826241	CFD223	3	573756508
gwm301	2	644616259	WMC817	2	640990817
gwm314	3	566130020	WMC656	3	523139428
gwm319	2	343692932	gwm630	2	372262632
gwm320	2	642563427	CFD50	2	649870949
gwm325	6	104424731	WMC398	6	94456301
gwm33	1	8881496	GDM33	1	653884
gwm335	5	361748095	gwm213	5	361748065
gwm339	2	113286768	gwm515	2	121023974
gwm349	2	628147203	WMC167	2	630792014
gwm357	1	362902343	BARC83	1	387101640
gwm358	2	240945343	CFD17	2	229009989
gwm358	5	134582749	GPW5201	5	87705590
gwm371	5	447874737	CFD102	5	437075849
gwm375	4	461640500	gwm6	4	504954451
gwm382	2	639493107	CFD50	2	649870949
gwm383	3	541114465	gwm664	3	521231697
gwm391	3	429976581	gwm107	6	459272955
gwm4	4	522012375	GPW4545	4	507358501
gwm427	6	464989647	DUPW167	6	495079944
gwm429	2	47439942	WMC453	2	57870354
gwm43	4	336509781
gwm445	2	538203847	gwm47	2	581225032
gwm455	2	15688336	CFD36	2	14475681
gwm47	2	581225032	WMC170	2	570054415
gwm473	2	306300055	WMC630	5	267264439
gwm484	2	49117097	BARC168	2	45709562
gwm498	1	264463288	BARC240	1	294231998
gwm513	4	366891437	PSP3078	3	328340855
gwm515	2	121023974	gwm339	2	113286768
gwm52	3	363146417
gwm526	2	629070357	GDM93	2	629070317
gwm539	2	511843939	WMC797	2	472328043
gwm540	4	405679187	CFD2	7	411170233
gwm540	5	140644577	CFA2070	5	125955388
gwm544	1	440091449	gwm268	1	469324002
gwm55	2	505283569	gwm271	5	462769675
gwm55	6	306940691	WMC748	6	355575239
gwm565	5	569181533	BARC110	5	541120610
gwm582	6	394993856	CFD76	6	385814797
gwm583	5	416292307	CFD8	5	403543935
gwm6	4	504954451	CFD54	4	511151369
gwm614	2	4949149	CFD238	2	14919967
gwm624	4	110007566
gwm630	2	372262632	gwm319	2	343692932
gwm636	2	5937646	WMC382	2	1377767
gwm639	5	425007359	WMC415	5	429428287
gwm642	1	419300752	WMC732	1	439729329
gwm645	3	505927340	WMC492	3	470309540
gwm654	5	569157621	gwm269	5	569181525
gwm664	3	521231697	gwm645	3	505927340
gwm666	3	357626183	WMC388	3	357626399
gwm674	3	177751085
gwm71	3	2312594	BARC135	3	27232723
gwm72	3	282678008	GPW5288	3	277081671
gwm72	3	282678008	GPW5288	4	324781760
GWP3127	7	592048095	WMS282	7	516214719
Hv26916	2	80774174
HVCABG	4	125173359
HVDHN09	5	458683797	GBM5008	5	446477963
HVDHN9	5	458683797
HvLOX	6	38170110	Bmag0344	6	87697488
HVM03-337	4	125173359
HVM20	1	226049798	GBM1234	1	261903016
HVM23	2	371686945	GMS3	2	351628212
HVM3	4	125173359	HVRCABG	4	125173359
HVM31	6	126782928	Bmac0297	1	83168281
HVM36	2	28120732	GBM1251	2	62444833
HVM4	7	35538574
HVM64	1	136028950
HVM68	4	434878175	GBM1509	4	409744026
HVRCABG	4	125173359	HVM3	4	125173359
HVWAXYG	7	35538552
IWA4789	2	480945491	WMS539	2	511843939
IWA7431	6	339998444	WMC807	6	350597584
KSUM176	1	500837584
KSUM69	5	392743570
MAG1353	5	137876306	CFD2	5	83159474
MAG1406	6	139797644
MAG1410	4	2173769
MAG1411	4	32206956
MAG1412	4	522637702	WMC74	4	519869613
MAG1413	4	491221955
MAG1414	4	12911106
MAG1418	4	125170396
MAG1419	4	6529738
MAG1420	4	413407434
MAG1421	4	514062245
MAG1424	6	802324	GDM136	1	10842916
MAG1426	5	337272278	MAG467	5	349479667
MAG1427	4	467167188
MAG1429	4	374553639
MAG1430	4	430454042
MAG1431	4	47195624
MAG1434	4	122169377
MAG1437	4	32802872
MAG1439	4	465146422
MAG1440	4	123338249
MAG1441	5	522615748
MAG1442	4	507852753
MAG1443	4	61719882
MAG1448	4	514062241
MAG1449	6	214169234
MAG1452	3	593753598
MAG1454	6	176219376
MAG1455	2	609519255
MAG1455	4	204622071
MAG1456	1	410366085
MAG1457	6	167996990
MAG1459	6	478318413	GDM98	6	479413954
MAG1461	1	479946858
MAG1461	5	446477962
MAG1465	6	43764494
MAG1466	1	224621262
MAG1467	6	3235902
MAG1470	6	211156036	CFD80	6	185195513
MAG1472	2	133814031
MAG1472	4	226273215
MAG1473	1	285666998
MAG1474	6	479388731
MAG1475	4	204475380
MAG1477	6	342653640
MAG1479	6	449020820
MAG1482	6	429499448
MAG2152	5	490838884	WMC723	5	478400267
MAG464	2	39190710	gwm429	2	47439942
MAG466	5	360725202
MAG467	5	349479667	MAG1426	5	337272278
MAG469	5	531158202
MAG473	1	253811946
MAG473	2	176339967
MAG473	5	226320834
MAG475	5	413005349
MAG477	5	240429145
MAG479	1	460036624	WMC419	1	421942881
MAG481	1	253811947
MAG482	2	344584892
MAG482	3	466721007
MAG484	1	498078552
MAG484	4	484670143
MAG487	6	44125629
MAG489	3	299490324
MAG490	3	306883124
MAG490	4	201776619
MAG492	5	383368139
MAG493	5	383367910
MAG495	5	369348541
MAG497	5	383368026
MAG498	4	136654201
MAG499	6	292742359
MAG500	3	6704380	gwm161	3	7462618
MAG501	3	6704380	BARC147	3	6768470
MAG502	4	296611721
MAG503	5	257646298
MAG504	5	257646158
MAG514	6	486627139
MAG515	6	486627288
MAG516	6	486627445
MAG517	6	486627709
MAG518	1	278263345
MAG520	6	364865516
MAG521	6	364865672	WMC182	4	394319688
MAG522	3	524622216
MAG524	6	427800903
MAG525	6	427800903
MAG530	5	476351030
MAG531	5	476351030
MAG532	5	398969137	gwm371	5	447874737
MAG541	5	204844433
MAG542	3	623873666
MAG545	1	314221669
MAG548	2	570031087	CFD16	2	580872648
MAG549	3	306883124
MAG549	4	201776619
MAG552	4	516334976
MAG553	2	70407681
MAG554	2	70407616
MAG555	2	70407553
MAG557	3	581077513	gwm162	3	619045611
MAG561	4	5539970
MAG564	6	9407094
MAG566	3	534004593
MAG568	3	157141755
MAG570	6	128401255
MAG571	6	128401791
MAG572	6	128401672
MAG574	3	157143852	WMC533	3	131380020
MAG577	2	586958683
MAG578	6	402074379
MAG580	4	20535881
MAG581	4	20535622
MAG584	5	374489030
MAG585	5	354653151
MAG586	6	175482391
MAG587	6	175482391
MAG590	1	324964557
MAG591	6	474381033
MAG592	6	153376963
MAG593	6	357335014
MAG594	5	381473171
MAG595	4	10380267
MAG596	4	23601929
MAG599	5	440397220
MAG601	5	501620773
MAG602	5	501620773
MAG609	4	295707707
MAG611	2	627872904
MAG614	5	545819319
MAG615	3	626686991	MAG896	3	618981328
MAG616	3	168810768
MAG617	1	290037687
MAG620	3	284701983
MAG621	1	231256955
MAG623	1	300614262
MAG686	5	81733441
MAG690	5	28471189
MAG693	5	40738220
MAG694	5	30739682
MAG697	5	31503421
MAG698	5	65724257
MAG702	4	204475380
MAG704	6	107887536
MAG705	5	6462883
MAG706	5	100623385
MAG758	5	122281632
MAG759	5	119884832
MAG763	5	117586560
MAG764	5	117580383
MAG766	5	115972439
MAG767	3	534514921
MAG767	3	534514923
MAG767	4	133379120
MAG767	4	133379121
MAG768	5	113975690
MAG769	5	108127062
MAG771	5	106853981
MAG773	5	100925497
MAG774	5	100623384
MAG778	5	88175521
MAG780	5	83791788
MAG781	5	80948489
MAG782	5	76876003
MAG783	5	72637221
MAG784	4	45978889
MAG786	5	70892188
MAG789	3	82993063
MAG789	5	466268982
MAG792	1	7115124
MAG796	3	319800429
MAG797	2	18833874
MAG797	3	267813210
MAG797	5	372380731
MAG798	6	460363635
MAG801	4	308366648
MAG806	3	359453026
MAG807	1	298838766
MAG808	3	436327739
MAG810	3	61371134
MAG811	3	344695546
MAG817	5	250666322
MAG819	5	520705729
MAG821	4	120190063
MAG822	3	626652714
MAG826	3	163506918
MAG827	1	245864017
MAG834	1	323643116	WMC333	1	281620298
MAG839	1	65077019
MAG842	1	70834719
MAG842	2	161756
MAG842	2	156553866
MAG842	5	319610108
MAG844	1	108657290
MAG849	1	474882395
MAG851	5	274589871
MAG852	3	612562495
MAG854	2	162880499
MAG855	2	190388917
MAG858	4	492088622
MAG863	2	385009455
MAG865	5	227469219
MAG866	2	601960213
MAG869	5	471103838
MAG871	1	443910588
MAG872	2	357245820
MAG873	2	357241521
MAG874	1	75907304
MAG875	5	558837410
MAG876	2	207526284
MAG878	2	113638264
MAG880	5	483495492
MAG884	5	571366564
MAG888	5	64653079
MAG889	5	64653078
MAG893	2	645840022	WMC445	2	644925387
MAG894	5	369096570
MAG896	3	618981328	MAG615	3	626686991
MAG901	5	432196431
MAG903	4	525112326
MAG904	5	560194131
MAG905	3	686725	MAG912	3	686725
MAG908	4	383918301
MAG910	5	388659406
MAG911	6	479603183
MAG912	3	686725	MAG905	3	686725
MAG916	3	605098189
MAG923	4	409178654
MAG924	3	344695546
MAG927	5	489285043
MAG931	1	491622782
MAG940	2	122731088
MAG945	2	621463707
MAG952	4	46883345
PSP3000	1	4927674	GPW7478	3	54852176
PSP3000F.1/PSP3000R	1	4927674
PSP3009	6	317153632	gwm133	6	295761951
PSP3035	3	342412542	PSP3078	3	328340855
PSP3035	7	105887293	CFA2174	7	114580790
PSP3037	1	370923526	CFD19	1	335157321
PSP3037	5	43076846
PSP3047	3	88389249	CFA2262	2	102479264
PSP3065	5	552070220	BARC69	3	562852022
PSP3071	6	333713457	GPW2222	6	355575252
PSP3078	3	328340855	PSP3035	3	342412542
PSP3103	4	108449442	WMC48	4	70644550
PSP3112	4	332405988
PSP3112	6	375323064	WMC182	4	394319688
PSP3113	7	228495019	BARC128	1	197864334
PSP3113	7	228495019	BARC128	7	237190492
PSP3200	6	57214	CFD49	6	1591050
SCAR3362	7	631895905	GPW4050	7	640898383
SCM5	3	453912836
scssr00334	2	376523232	HVM23	2	371686945
scssr02093	6	237532742	Bmac0297	6	221345893
scssr02503	5	70307239	GBM5028	5	35283120
scssr05599	6	453748913	GBM1356	6	458527312
scssr07970	6	357335339
scssr08238	1	500973201
scssr08447	2	647796530
scssr09041	5	568946892
scssr10148	5	489284991	GBM1363	5	467865943
scssr14079	4	449667116	GBM5210	4	439376957
scssr16991	5	358291869	Bmac0144	2	396508387
scssr18005	4	309318533
scssr25538	3	622615356
UMB001	1	479946853
UMB202	1	60339939
UMB202	4	504920501
UMB203	2	26389855
UMB301	3	5030025
UMB309	3	82992451
UMB401	1	445125068
UMB401	4	34624478
UMB501a	1	54876918
UMB501b	1	54876918
UMB507	1	51796879
UMB703	5	320484627
WMC102	2	235482123	BARC128	1	197864334
WMC102	2	235482123	BARC128	7	237190492
WMC11	3	5717554	CFD35	3	115706
WMC110	5	529211588	CFA2185	5	514101758
WMC111	2	14475611	WMC25	2	19903391
WMC112	2	24288296	WMC503	2	20403724
WMC113	6	46092815	GPW4440	6	45881935
WMC121	7	133931796	CFA2174	7	114580790
WMC125	4	7591173
WMC125	4	469309586	BARC227	4	460699025
WMC125	4	512602564	gwm6	4	504954451
WMC128	1	156290004	WMC31	1	156289892
WMC136	5	571511276
WMC139	7	237195072	CFD193	4	219068245
WMC14	7	631014444	WMC166	7	626829335
WMC144	2	268732605	GPW3105	2	232400255
WMC150	5	113440799	gwm293	5	102263741
WMC153	3	577402895	WMS155	3	593916215
WMC155	3	179348052
WMC156	1	303200620	GPW7603	1	346075334
WMC160	5	508328029	BARC232	5	509419527
WMC161	5	556125084	CFD10	5	550400457
WMC166	7	626829335	CFD69	7	631591538
WMC167	2	630792014	gwm349	2	628147203
WMC17	7	137540924	CFD68	7	175939387
WMC170	2	570054415	gwm294	2	577200226
WMC171	2	507167737
WMC173	3	445693965	CFD2	7	411170233
WMC175	3	323081476
WMC18	2	131935331	gwm249	2	142528840
WMC181	2	592441201	WMC170	2	570054415
WMC182	3	278890673	CFD4	3	297280857
WMC182	4	394319688
WMC183	1	174550456	WMC390	2	133984079
WMC183	1	429924594	BARC28	5	413965391
WMC185	4	56625710
WMC190	2	401648468
WMC198	2	132366245
WMC206	1	248830390	GDM101	2	295286621
WMC206	5	529739763	GDM63	5	529204844
WMC210	2	5897248	BARC200	2	30748794
WMC213	2	91747155	GPW1148	2	58075811
WMC215	5	481783348	gwm182	5	447137961
WMC216	1	369876670	BARC169	1	333954212
WMC216	1	369876670	BARC169	6	386902259
WMC219	4	2389118
WMC222	1	18628436	BARC229	1	60532841
WMC231	3	45960621	BARC68	6	7807148
WMC233	5	5507588	CFD18	5	6078883
WMC243	2	270372308	WMC441	2	308603661
WMC243	6	242734940	WMC182	3	278890673
WMC245	2	188301845	WMC498	2	189658213
WMC25	2	19903391	WMC111	2	14475611
WMC256	6	426935091	BARC204	6	453497861
WMC258	5	560506275
WMC261	1	419828207	WMC93	1	421675320
WMC261	3	428568682
WMC263	3	520523273
WMC269	1	175039096	WMS11	1	133810048
WMC27	2	113633491	WMC474	2	120949363
WMC272	2	206048878	WMS374	2	290618208
WMC285	4	1599976	WMC617	4	7453929
WMC289	5	462769712	gwm271	5	462769675
WMC307	3	338291616	CFD4	3	297280857
WMC309	3	438663947
WMC31	1	156289892	WMC611	1	136464709
WMC313	4	391718814	WMC722	4	350424360
WMC314	2	33792539	gwm210	2	5897248
WMC318	5	243606569	CFD37	6	272165519
WMC320	1	407205217	WMC216	1	369876670
WMC323	7	63133431	CFA2106	7	89841352
WMC326	5	496581013	WMC75	5	474928022
WMC329	1	18714642	CFA2158	1	18628425
WMC331	4	459606283	GDM125	4	450440245
WMC333	1	281620298	MAG834	1	323643116
WMC339	1	201436602	WMC590	1	204859479
WMC341	6	338686447	WMC397	6	298941735
WMC35	2	112203295	CFD11	2	79984093
WMC350	5	90577763
WMC357	5	509850422	CFD283	5	525356375
WMC36	1	415633757	CFA2129	1	423985821
WMC366	3	299995814	CFD4	3	297280857
WMC367	3	2639201
WMC371	5	404168734	CFD2	7	411170233
WMC379	3	275366579
WMC382	2	1377767	gwm296	2	18153491
WMC385	1	462918559	WMC59	1	486627840
WMC386	5	150489766	gwm540	5	140644577
WMC388	3	357626399	gwm666	3	357626183
WMC390	1	15326734
WMC390	2	133984079
WMC391	1	240472834	GPW1239	1	226757108
WMC395	3	519620520	WMC418	3	473904622
WMC397	6	298941735	WMC341	6	338686447
WMC398	6	94456301	gwm325	6	104424731
WMC399	4	491218123	WMC206	5	529739763
WMC401	2	247726966
WMC405	5	410268843	WMS639	5	425014064
WMC41	2	576025232	CFD168	2	578287658
WMC413	4	506112457	gwm664	3	521231697
WMC415	5	429428287	gwm639	5	425007359
WMC416	6	59392905	CFD75	6	13632135
WMC418	3	473904622	BARC164	3	454950735
WMC419	1	421942881	gwm131	3	465328499
WMC419	1	421942881	gwm131	5	443385344
WMC420	4	329468388
WMC422	7	437902392	WMC695	4	459665899
WMC428	3	462678274	WMC527	3	421927999
WMC429	1	283097051	GDM19	1	265179585
WMC43	3	27034182	CFD79	3	13053973
WMC432	1	9797000	gwm33	1	8881496
WMC434	4	112027667
WMC434	5	476797484	gwm212	5	482233291
WMC435	2	540374308	gwm47	2	581225032
WMC435	3	176020521	BARC125	2	149464091
WMC435	3	176020521	BARC125	3	177665351
WMC435	5	117726892	CFA2070	5	125955388
WMC439	5	125955028
WMC441	2	308603661	WMC175	3	323081476
WMC443	5	570552720	gwm565	5	569181533
WMC445	2	644925387	MAG893	2	645840022
WMC453	2	57870354	BARC55	1	46945077
WMC457	4	271247888	WMC182	3	278890673
WMC463	7	37620212	BARC352	7	39411727
WMC470	2	32185482	gwm455	2	15688336
WMC470	5	48644560	BARC124	2	4442173
WMC471	3	579306136
WMC473	4	208203359	CFD193	4	219068245
WMC474	2	120949363	gwm275	2	95537952
WMC476	7	335231691	BARC176	7	299445123
WMC479	7	21065081	BARC219	7	64531817
WMC48	4	70644550	WMC89	4	70644544
WMC492	3	470309540	gwm645	3	505927340
WMC493	3	73271241
WMC498	2	189658213	WMC245	2	188301845
WMC503	2	20403724	gwm261	2	20395218
WMC505	3	79026180	gwm133	5	75058463
WMC510	3	59944877
WMC52	4	119836807	WMC48	4	70644550
WMC522	2	59872162	WMC474	2	120949363
WMC524	5	279781835
WMC527	3	421927999	WMC428	3	462678274
WMC529	3	64437144	WMC27	2	113633491
[truncated: 194 more rows]
